# Supplementary material for: Fatty Acid Composition of Northern Pike from an Arctic River (Northeastern Siberia, Russia)
Source: MDPI journal article supplement (doi:10.3390/foods12040764), 2023-02-09
Supplement: s1 [file s1]

## Supplementary Material

**Table S1.** Results of similarity percentage (SIMPER) comparison between pike inhabiting different locations, to find fatty acids that best distinguish between the sites.

| Pair                       | Dissimilarity, % | Fatty Acids (Contribution)                   |
|----------------------------|------------------|----------------------------------------------|
| Ar-GR-Rus – Ar-LS-Rus      | 16.64            | C18:1n7 (14%), C22:6n3 (7%), C13:0 (6%)      |
| Ar-GR-Rus – Sub-UB-Rus     | 18.39            | C18:1n7 (12%), C18:4n-3 (7%), C13:0 (6%)     |
| Ar-GR-Rus – Temp-DR-Ser    | 25.49            | C22:6n3 (12%), C18:1n11 (12%), C8:0 (9%)     |
| Ar-GR-Rus – Temp-DWL-Pol   | 15.36            | C18:1n11 (14%), C18:4n-3 (7%), C17:0 (7%)    |
| Ar-GR-Rus – Temp-GL-Rus    | 16.11            | C16:1n7 (9%), C13:0 (7%), C16:1n9 (7%)       |
| Ar-GR-Rus – Temp-IL-It     | 19.68            | C18:1n7 (11%), C22:5n6 (10%), C18:0 (9%)     |
| Ar-GR-Rus – Temp-LS-Can    | 28.32            | C16:1n7 (17%), C16:1n9 (10%), C14:0 (6%)     |
| Ar-GR-Rus – Warm-CL-USA    | 16.34            | C15:0 (7%), C17:0 (7%), C13:0 (7%)           |
| Ar-GR-Rus – Warm-EL-Tur    | 20.5             | C24:1 (12%), C22:5n3 (11%), C22:5n6 (9%)     |
| Ar-GR-Rus – Warm-KL-Tur    | 20.5             | C22:5n3 (11%), C22:5n6 (9%), C24:1 (9%)      |
| Ar-LS-Rus – Temp-DR-Ser    | 32.52            | C22:6n3 (14%), C18:1n11 (10%), C8:0 (8%)     |
| Ar-LS-Rus – Temp-IL-It     | 13.93            | C18:0 (20%), C22:5n6 (10%), C18:3n3 (6%)     |
| Ar-LS-Rus – Temp-LS-Can    | 28.26            | C16:1n7 (16%), C22:6n3 (10%), C18:1n7 (9%)   |
| Ar-LS-Rus – Warm-CL-USA    | 17.08            | C18:1n7 (15%), C18:3n3 (8%), C14:0 (7%)      |
| Ar-LS-Rus – Warm-EL-Tur    | 27.43            | C24:1 (11%), C22:5n3 (9%), C18:1n7 (6%)      |
| Ar-LS-Rus – Warm-KL-Tur    | 27.14            | C24:1 (10%), C22:5n3 (9%), C18:1n7 (9%)      |
| Sub-UB-Rus – Ar-LS-Rus     | 10.38            | C20:2n6 (9%), C20:3n6 (8%), C18:3n3 (7%)     |
| Sub-UB-Rus – Temp-DR-Ser   | 32.61            | C22:6n3 (13%), C18:1n11 (10%), C8:0 (8%)     |
| Sub-UB-Rus – Temp-IL-It    | 14.75            | C18:0 (15%), C22:5n6 (14%), C22:4n6 (9%)     |
| Sub-UB-Rus – Temp-LS-Can   | 23.86            | C16:1n7 (18%), C22:6n3 (11%), C18:1n7 (10%)  |
| Sub-UB-Rus – Warm-CL-USA   | 17.88            | C18:1n7 (13%), C16:1n9 (9%), C22:4n6 (9%)    |
| Sub-UB-Rus – Warm-EL-Tur   | 29.3             | C24:1 (11%), C16:1n9 (7%), C22:5n3 (7%)      |
| Sub-UB-Rus – Warm-KL-Tur   | 30.1             | C24:1 (9%), C18:1n7 (7%), C22:5n3 (7%)       |
| Temp-DR-Ser – Temp-LS-Can  | 35.46            | C16:1n7 (14%), C16:1n9 (12%), C18:1n11 (10%) |
| Temp-DR-Ser – Warm-CL-USA  | 30.28            | C22:6n3 (13%), C18:1n11 (11%), C8:0 (9%)     |
| Temp-DR-Ser – Warm-EL-Tur  | 32.87            | C18:1n11 (9%), C24:1 (9%), C22:6n3 (8%)      |
| Temp-DR-Ser – Warm-KL-Tur  | 32.5             | C18:1n11 (10%), C8:0 (8%), C22:6n3 (8%)      |
| Temp-DWL-Pol – Ar-LS-Rus   | 16.74            | C18:1n7 (15%), C18:1n11 (14%), C18:3n3 (8%)  |
| Temp-DWL-Pol – Sub-UB-Rus  | 14.56            | C18:1n11 (16%), C18:1n7 (15%), C20:2n6 (8%)  |
| Temp-DWL-Pol – Temp-DR-Ser | 25.28            | C22:6n3 (14%), C8:0 (10%), C22:5n6 (8%)      |
| Temp-DWL-Pol – Temp-IL-It  | 17.7             | C18:1n11 (13%), C18:0 (13%), C18:1n7 (12%)   |
| Temp-DWL-Pol – Temp-LS-Can | 24.13            | C16:1n7 (21%), C16:1n9 (12%), C18:1n11 (10%) |
| Temp-DWL-Pol – Warm-CL-USA | 14.4             | C18:1n11 (17%), C22:4n6 (11%), C20:2n6 (8%)  |
| Temp-DWL-Pol – Warm-EL-Tur | 27.56            | C24:1 (11%), C22:5n3 (8%), C18:1n11 (8%)     |
| Temp-DWL-Pol – Warm-KL-Tur | 25.17            | C24:1 (10%), C22:5n3 (9%), C18:1n11 (9%)     |
| Temp-GL-Rus – Ar-LS-Rus    | 12.44            | C18:1n7 (21%), C22:5n3 (10%), C18:3n3 (8%)   |
| Temp-GL-Rus – Sub-UB-Rus   | 8.31             | C18:1n7 (28%), C22:5n3 (9%), C22:5n6 (8%)    |
| Temp-GL-Rus – Temp-DR-Ser  | 30.18            | C22:6n3 (14%), C18:1n11 (11%), C8:0 (9%)     |
| Temp-GL-Rus – Temp-DWL-Pol | 15.1             | C18:1n11 (16%), C16:1n7 (10%), C22:5n3 (7%)  |
| Temp-GL-Rus – Temp-IL-It   | 17.79            | C18:1n7 (13%), C18:0 (12%), C22:5n3 (10%)    |
| Temp-GL-Rus – Temp-LS-Can  | 23.33            | C16:1n7 (16%), C22:6n3 (11%), C18:1n9 (10%)  |
| Temp-GL-Rus – Warm-CL-USA  | 17.76            | C16:1n9 (10%), C22:4n6 (9%), C16:1n7 (9%)    |
| Temp-GL-Rus – Warm-EL-Tur  | 26.83            | C24:1 (12%), C16:1n9 (8%), C24:0 (6%)        |

|                           |       |                                             |
|---------------------------|-------|---------------------------------------------|
| Temp-GL-Rus – Warm-KL-Tur | 26.78 | C24:1 (10%), C16:1n9 (6%), C24:0 (6%)       |
| Temp-IL-It – Temp-DR-Ser  | 31.65 | C22:6n3 (12%), C18:1n11 (10%), C8:0 (8%)    |
| Temp-IL-It – Temp-LS-Can  | 29.94 | C16:1n7 (17%), C18:1n7 (8%), C18:0 (7%)     |
| Temp-IL-It – Warm-CL-USA  | 17.41 | C18:0 (17%), C18:1n7 (13%), C22:5n6 (10%)   |
| Temp-IL-It – Warm-EL-Tur  | 30.02 | C24:1 (10%), C22:5n3 (10%), C18:0 (8%)      |
| Temp-IL-It – Warm-KL-Tur  | 32.51 | C22:5n3 (9%), C18:0 (8%), C24:1 (8%)        |
| Warm-CL – USA-Temp-LS-Can | 20.28 | C16:1n7 (27%), C16:1n9 (19%), C22:6n3 (12%) |
| Warm-EL-Tur – Temp-LS-Can | 38.22 | C16:1n7 (13%), C16:1n9 (11%), C24:1 (9%)    |
| Warm-EL-Tur – Warm-CL-USA | 25.93 | C24:1 (12%), C22:5n3 (10%), C15:0 (7%)      |
| Warm-KL-Tur – Temp-LS-Can | 35.92 | C16:1n7 (14%), C16:1n9 (10%), C24:1 (8%)    |
| Warm-KL-Tur – Warm-CL-USA | 27.57 | C22:5n3 (10%), C24:1 (10%), C15:0 (7%)      |
| Warm-KL-Tur – Warm-EL-Tur | 10.01 | C22:4n6 (11%), C20:4n6 (10%), C14:0 (9%)    |

Abbreviations: Ar-GR-Rus – Gyda River (Arctic, Russia), Temp-GL-Rus – Lake Gusinoe (Russia), Temp-DWL-Pol – Dgiał Wielki Lake (Poland, Europe), Sub-UB-Rus – Ubei Bay (sub-Arctic, Russia), Ar-LS-Rus – Sobachie Lake (Arctic, Russia), Temp-IL-It – Iseo Lake (Italy, Europe), Temp-DR-Ser – Danube River (Serbia, Europe), Warm-KL-Tur – Karamik Lake (Turkey), Warm-EL-Tur – Eber Lake (Turkey), Warm-CL-USA – Cayuga Lake (USA), Temp-LS-Can – Lac Ste. Anne (Canada).
